# Supplementary material
Source: Royal Society of Chemistry journal article supplement (doi:10.1039/d5cc07322g)
Supplement: d5cc07322g5.pdf [file d5cc07322g5.pdf]

Raw Image of SDS-PAGE Gel 1

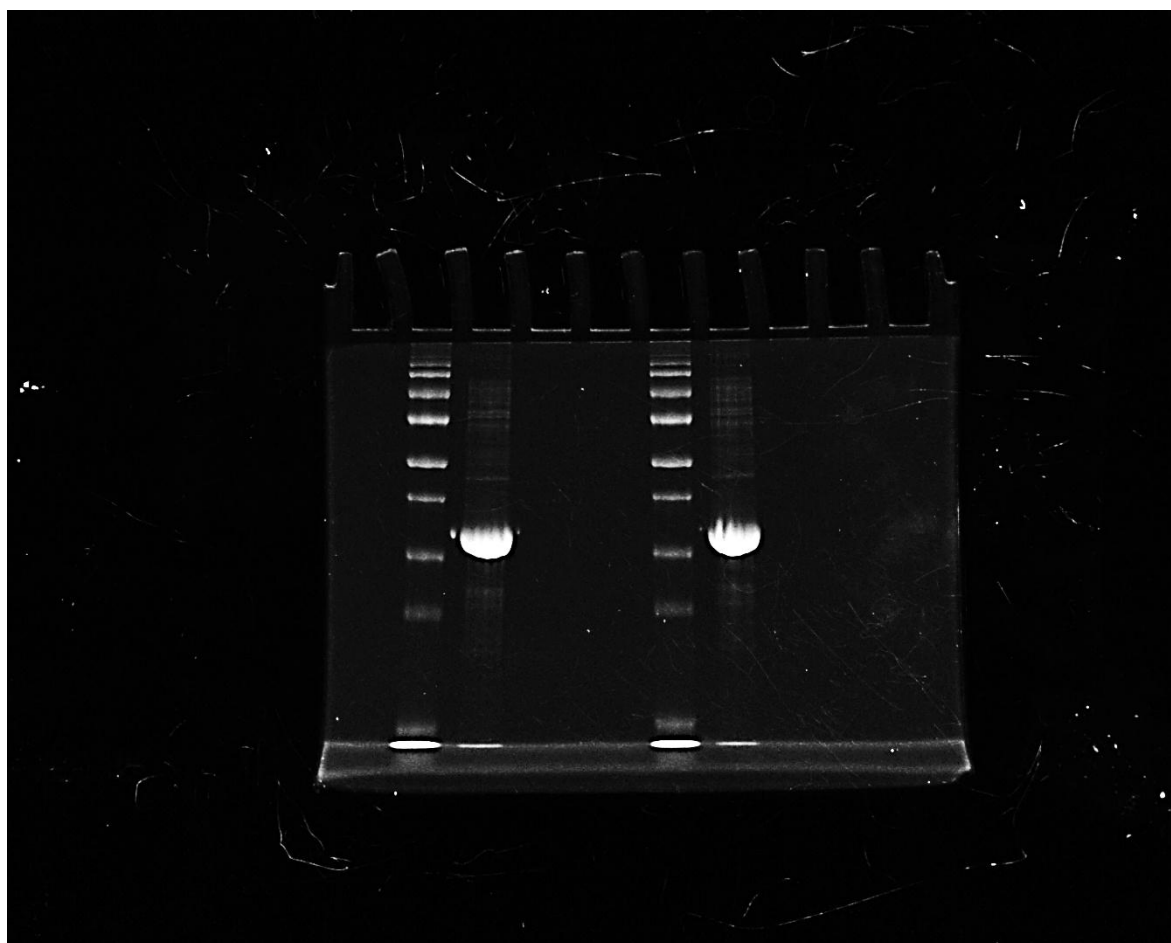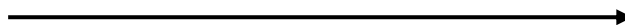

| 1     | 2      | 3          | 4     | 5     | 6      | 7          | 8     | 9     | 10    |
|-------|--------|------------|-------|-------|--------|------------|-------|-------|-------|
| Blank | Ladder | BsGDH L95V | Blank | Blank | Ladder | BsGDH L95V | Blank | Blank | Blank |

Raw Image of SDS-PAGE Gel 2

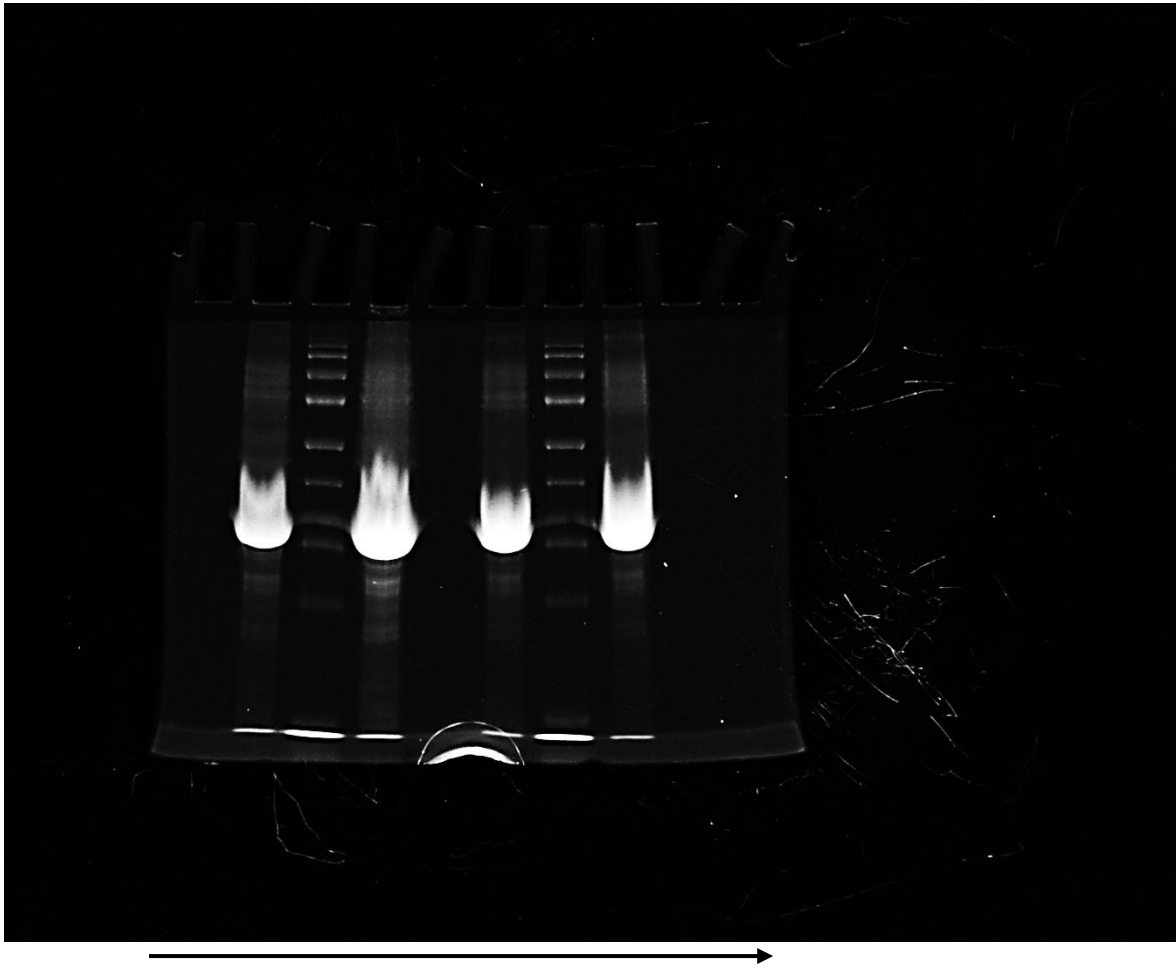

| 1     | 2     | 3      | 4           | 5     | 6     | 7      | 8           | 9     | 10    |
|-------|-------|--------|-------------|-------|-------|--------|-------------|-------|-------|
| Blank | OsGDH | Ladder | BsGDH Q252K | Blank | OsGDH | Ladder | BsGDH Q252K | Blank | Blank |

Raw Image of SDS-PAGE Gel 3

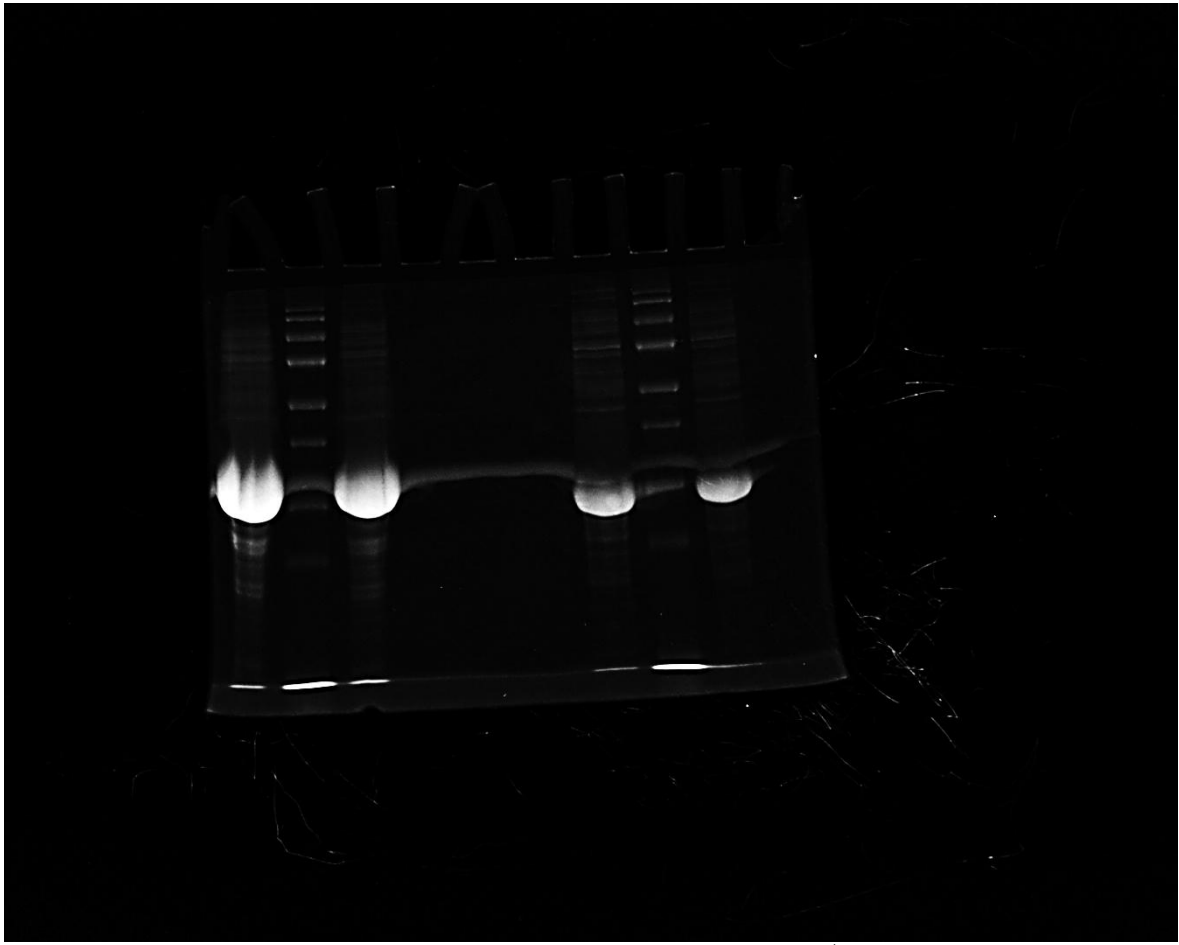

| 1        | 2      | 3        | 4     | 5     | 6     | 7      | 8      | 9      | 10    |
|----------|--------|----------|-------|-------|-------|--------|--------|--------|-------|
| BsGDH_WT | Ladder | BsGDH_WT | Blank | Blank | Blank | RasADH | Ladder | RasADH | Blank |
