# Supplementary material
Source: Royal Society of Chemistry journal article supplement (doi:10.1039/d5cc07322g)

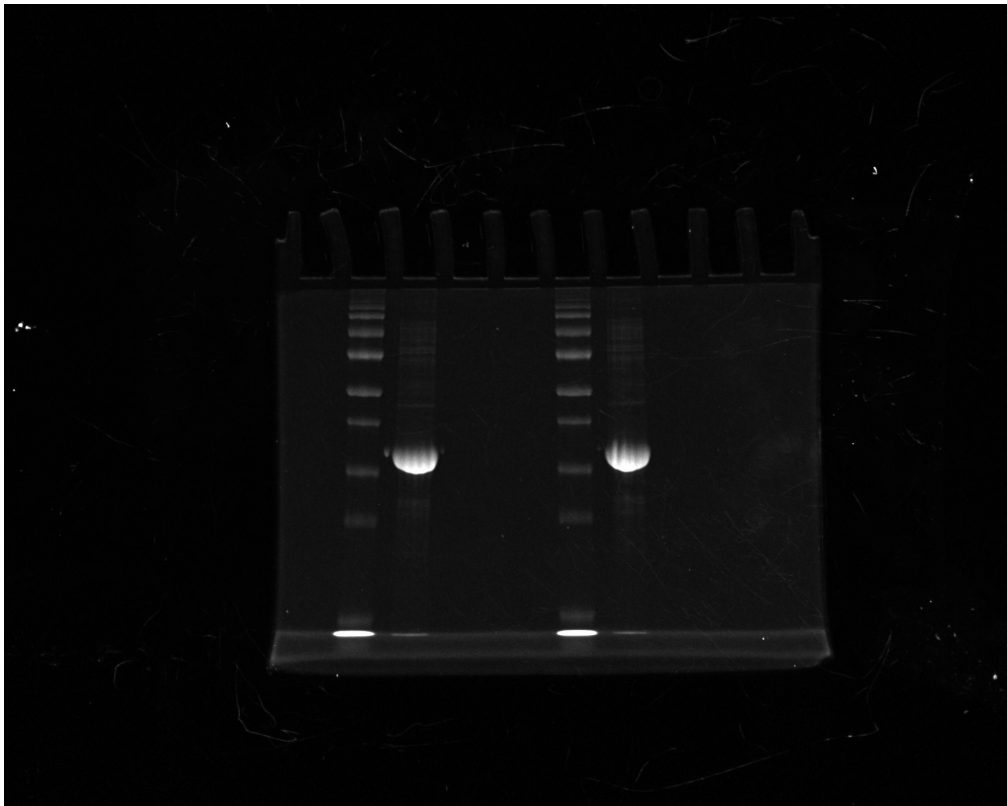

Supplement: d5cc07322g1.pdf [file d5cc07322g1.pdf]
